# Supplementary material
Source: PubMed Central journal article supplement (PMC5394878)
Supplement: 5749beff058a4f7389e637b4f0fa78da_2016_150334-Disclosures_and_Contributions.pdf [file 5749beff058a4f7389e637b4f0fa78da_2016_150334-Disclosures_and_Contributions.pdf]

Haematologica  
HAEMATOL/2016/150334  
Version 4

Upfront autologous stem cell transplantation for newly diagnosed elderly multiple myeloma patients: a prospective multicenter study

Laurent Garderet, Eric Beohou, Denis Caillot, Anne Marie Stoppa, Cyrille Touzeau, Marie Lorraine Chretien, Lionel Karlin, Philippe Moreau, Jean Fontan, Didier Blaise, Emmanuelle Polge, Mor Seny Gueye, Souhila Ikhlef, Zora Marjanovic, Myriam Labopin, and Mohamad Mohty

Disclosures: none

Contributions: Contributions: GL, PE, G MS, LM, MP, MM designed the research and/or analyzed data, GL, CD, S AM, TZ, C ML, KL, MP, FJ, BD, IS, MZ provided important clinical data, GL, CD, S AM, MP, MM wrote the first draft of the manuscript and all authors approved the final version of the manuscript.
